# Hide and seek: hidden genetic variance contributing to the adaptive potential of selfing populations

Josselin CLO <sup>§</sup>, Joëlle RONFORT <sup>§</sup>, Diala ABU AWAD <sup>§,\*</sup>

<sup>§</sup> AGAP, Univ Montpellier, CIRAD, INRA, Montpellier SupAgro, 34000 Montpellier, France.

<sup>\*</sup> Technical University of Munich, 85354 Freising, Germany.

**Running title:** Partial self-fertilization and adaptation from standing genetic variation.

**Keywords:** self-fertilization, standing genetic variation, adaptation, cryptic genetic variation, residual allogamy.

**Corresponding author:** Josselin CLO, Arthur Young street, 34000 Montpellier, +33432722335, josselin.clo@gmail.com

**Abstract:** Standing genetic variation is considered a major contributor to the adaptive potential of species. The low heritable genetic variation observed in self-fertilising populations has led to the hypothesis that species with this particular mating system would be less likely to adapt. However, a non-negligible amount of cryptic genetic variation for polygenic traits, accumulated through negative linkage disequilibrium, could prove to be an important source of standing variation in self-fertilising species. Using a classical quantitative genetics model, we demonstrate that selfing populations are better able to store cryptic genetic variance than outcrossing populations, notably due to their lower recombination rate. Following a shift in the environment, this hidden diversity can be partially released, increasing the additive variance and adaptive potential of selfing populations. In such conditions, even though the process of adaptation itself is mating system dependant, selfers reach levels of fitness that are equal to or higher than outcrossing populations within a few generations. Outcrossing populations respond better to selection for the new optimum, but they maintain more genetic diversity resulting in a higher genetic load. In selfing populations, genetic diversity is remobilised, and new close-to-optimum genotypes are generated and quickly increase in frequency, leading to more homogenous populations. Our results bring new insights into the role of standing genetic variation for adaptation in selfing populations.

## INTRODUCTION

Natural populations harbour a significant amount of genetic variation, especially at loci governing polygenic traits (Mittell *et al.* 2015; Wood *et al.* 2016; Clo *et al.* 2019). This variation, known as standing genetic variation, has been considered to be an important predictor for the adaptive potential of populations (Orr and Betancourt 2001; Hermisson and

Pennings 2005; Barrett and Schluter 2008; Pritchard *et al.* 2010; Glémin and Ronfort 2013; Matuszewski *et al.* 2015). Indeed, standing variation represents an easily accessible, hence non-negligible, source of genetic variation, available for adaptation to changing conditions (Hermisson and Pennings 2005; Barrett and Schluter 2008). Contrary to adaptation from *de novo* mutations, the probability to adapt from standing variation is higher simply because beneficial mutations already segregating in a population are expected to be present at higher frequencies (Innan and Kim 2004; Barrett and Schluter 2008). It has also been suggested that populations adapting from standing genetic variation can cope with more severe and more rapid environmental change, as they are able to cross larger distances in phenotype space (Matuszewski *et al.* 2015). The amount of heritable variance is thus expected to play a key role in adaptation, and any forces affecting it may greatly influence whether or not populations are able to survive environmental changes.

An important characteristic of populations, known to greatly affect the amount of genetic variance, is the mating system. From both theoretical (Charlesworth and Charlesworth 1995; Lande and Porcher 2015; Abu Awad and Roze 2018) and empirical works (Charlesworth and Charlesworth 1995; Geber and Griffen 2003; Clo *et al.* 2019), it is known that, compared to outcrossing populations, self-fertilization reduces, on average, the amount of additive genetic variance for polygenic or quantitative traits under stabilizing selection. This diminution is due to more efficient purifying selection under selfing and linkage disequilibria maintained between alleles at different loci: the so-called Bulmer effect (Lande and Porcher 2015; Abu Awad and Roze 2018). Because of the low genetic variance maintained in self-fertilizing populations, this mating system has been qualified as an evolutionary dead-end (Stebbins 1957; Takebayashi and Morrell 2001; Iqbal and Busch 2013). However, theoretical and some empirical works are now pointing towards the existence of cryptic genetic variability (see Paaby and Rockman 2014 for a review), which should, in

addition to the “visible” genetic variation, contribute to the adaptive potential of natural populations. Cryptic genetic variation has been defined as a part of a population’s standing genetic variation that does not affect phenotypic variation in a stable environment, but can increase heritable variation in environmental conditions rarely experienced (Gibson and Dworkin 2004; Paaby and Rockman 2014). In other words, it defines a source of variability that is not expressed in stable conditions (due to conditional neutrality, the genetic structure of the population, etc), but which can contribute to adaptation in new conditions. Such “hidden” variability has been detected in both outcrossing (in sticklebacks (McGuigan *et al.* 2011), cavefish (Rohner *et al.* 2013), dung flies (Berger *et al.* 2011), gulls (Kim *et al.* 2013) or spadefoot toads (Ledon-Rettig *et al.* 2010)) and selfing species (*Caenorhabditis elegans*, Milloz *et al.* 2008; *Arabidopsis thaliana*, Queitsch *et al.* 2002). Two main mechanisms could explain the accumulation and the release of such variance: interactions between loci (Badano and Katsanis 2002; Carter *et al.* 2005; Shao *et al.* 2008), and phenotypic plasticity (Anderson *et al.* 2013). In this paper, we focus on interactions between loci.

To maintain the population as close as possible to the phenotypic optimum, stabilizing selection disfavors apparent genetic and phenotypic diversity (Lande and Porcher 2015; Abu Awad and Roze 2018). However, the structuration of the additive variance also strongly depends on the trait mutation rate and the prevalence of pleiotropy (Lande and Porcher 2015; Abu Awad and Roze 2018). When the per-trait mutation rate is weak, associations between loci are negligible, but when the rate increases, the creation and maintenance of co-adapted gene complexes structure the additive variance into positive within-loci components and negative among-loci components, reducing the observed additive variance (Abu Awad and Roze 2018). The remobilization of alleles contributing to this last component of variance could boost the evolvability of populations forced to undergo directional selection after a change in the phenotypic optimum (Le Rouzic and Carlborg 2008). Indeed, if associations

between loci are broken, segregating alleles could express some or all of their additive effects in new-genetic backgrounds. Classical models analyzing the effect of selfing on adaptation from standing genetic variation have considered a single locus (Glémin and Ronfort 2013), thus neglecting interactions among loci that could result in other forms of standing genetic variation. As self-fertilization reduces the effective recombination rate (Nordborg 2000), allowing the maintenance of co-adapted gene complexes, the storage of hidden genetic diversity should be stronger in selfing populations (as suggested in Lande and Porcher 2015; Abu Awad and Roze 2018), potentially increasing their probability to adapt to an environmental change beyond that expected from single-locus models.

In this paper, we explore this hypothesis, using a quantitative genetics framework. We describe and quantify how, to what degree, and under which conditions populations accumulate hidden genetic variation in this theoretical framework of polygenic traits. Though these polygenic trait models are based on simple hypotheses, they have so far proven to be surprisingly accurate in predicting the distribution of epistatic coefficients (Martin *et al.* 2007) and inferring the mean dominance coefficient of mutations (Manna *et al.* 2011). We show that, in models allowing for hidden genetic diversity and when adaptation is only possible from pre-existing standing genetic variation, selfing populations are able to perform just as well as their mixed-mating and outcrossing counterparts.

## **MATERIAL AND METHODS**

### **General assumptions**

We consider the evolution of a quantitative trait  $Z$  in a population of size  $N$ , made of diploid individuals reproducing through partial self-fertilization, with a constant selfing rate  $\sigma$ . The phenotypic value  $z$  of an individual is determined by the additive action of  $L$  loci each with an infinite possible number of alleles and is given by

$$z = g + e, (1)$$

where  $g$  is the genetic component of the individual's phenotype, and is given by  $g = \sum_j^L g_j^M + g_j^P$ , with  $g_j^M$  (respectively  $g_j^P$ ) the additive allelic effect at locus  $j$  inherited from the maternal (respectively paternal) gamete. The random environmental effect,  $e$ , is drawn from a Gaussian distribution of mean 0 and variance  $V_E$ , and is considered to be independent from the genetic components of fitness. The trait initially undergoes stabilizing selection around an optimal phenotypic value (set arbitrarily at 0). The fitness value  $W_Z$  of an individual with phenotype  $z$  is thus described by the Gaussian function:

$$W_Z = e^{-d^2/2\omega^2}, (2)$$

where  $d$  is the distance between the individual's phenotype  $z$  and the optimum trait value and  $\omega^2$  is the width of the fitness function, and represents the strength of selection.

## Simulation model

We implement the model described above into an individual based simulation model written in C++, a modified version of the “continuum of alleles” program provided in Abu Awad and Roze (2018). The simulation program is available in File S1 and online (<https://github.com/dialaAbAw/SelfingAdaptation>). The life cycle can be summarized by five

successive events: (1) phenotype-dependent choice of the maternal parent (selection), (2) mating-type choice (selfing versus outcrossing), (3) phenotype-dependent choice of the paternal parent in the case of outcrossing, (4) production of gametes (recombination) and (5) mutation. We simulate two phases. In the first one, the population evolves in a stable environment (for a fixed trait optimum value  $Z_{\text{OPT}} = 0$ ) until mutation-selection-drift equilibrium (M-S-D) and we explore the effect of the mating system on the genetic components and structure of a quantitative trait under stabilizing selection. In the second phase, we consider the rate of adaptation following a brutal shift in the optimum ( $Z_{\text{OPT}}$  shift from 0 to 2.5, the shift being of order  $L \cdot a^2$ ).

Each generation before equilibrium, the number of new mutations per chromosome per generation is sampled from a Poisson distribution with parameter  $U$ , the per-trait haploid genomic mutation rate (ranging from 0.005 to 0.1, in accordance with the literature (Keightley and Bataillon 2000; Shaw *et al.* 2002; Haag-Liautard *et al.* 2007)). The additive value of a new mutant allele is drawn from a Normal distribution of mean 0 and variance  $a^2$ . We use parameter set values similar to those in Bürger *et al.* (1989) and Ronce *et al.* (2009), with the number of freely recombining loci under selection  $L = 50$ ,  $a^2 = 0.05$ ,  $V_E = 1$ ,  $\omega^2 = 1$  (and hence  $V_S = \omega^2 + V_E$  is equal to 2). The mean deleterious effect of mutations  $\bar{s}$  ( $\bar{s} = a^2 / 2V_S$ , Martin and Lenormand 2006) is equal to 0.0125. Although simulations were run over a large range of selfing values, throughout the manuscript we show results run principally for three rates of self-fertilisation,  $\sigma = 0, 0.5$  and  $0.95$ , representing outcrossing, mixed-mating and predominantly selfing respectively. They are representative of the three main patterns observed over the whole range ( $\sigma$  from 0 to 1). We also considered two population sizes  $N = 250$  and  $1000$ .



## Simulation program:

At the start of a simulation, all  $N$  individuals are homozygous for allele 0 at all  $L$  loci and are thus at the fitness optimum. To form the next generation,  $N$  new zygotes are produced through selfing with probability  $\sigma$ , and through random mating with probability  $1-\sigma$ . Selection occurs during the sampling of parental individuals, occurring with probabilities proportional to their fitness. During meiosis, the number of cross-overs is sampled from a Poisson distribution with parameter  $R$  (which represents the genome map length), and the position of each cross-over along the chromosome is sampled from an uniform distribution. According to Haldane's mapping function, the recombination rate between two adjacent loci is  $r = \frac{1}{2} \left[ 1 - \exp \left( \frac{-2R}{L-1} \right) \right]$ , with  $R = 50$  in our simulations. Mutation occurs after recombination: the number of new mutations per chromosome per generation is sampled from a Poisson distribution with parameter  $U$ , the haploid genomic mutation rate ( $U = L\mu$ , with  $\mu$  being the per locus mutation rate). The additive value of a new mutant allele is drawn from a Normal distribution of mean 0 and variance  $a^2$ .

After reaching the M-S-D equilibrium, we introduce an environmental change by shifting the phenotypic optimum. The only source of genetic variability to reach the new optimum is the standing variation accumulated at M-S-D equilibrium (after the shift,  $U$  is set to 0). We then let the population evolve for 200 generations.

## *Effect of selfing on genetic variance structuration at Mutation-Selection-Drift equilibrium*

Following Turelli & Barton (Turelli and Barton 1990), we decompose the genetic variance of a polygenic trait using the following equation:

$$V_A = 2 \sum_j^L (C_{jj} + C_{j,j}) + 2 \sum_{j \neq k}^L (C_{jk} + C_{j,k}), \quad (3)$$

with

$$C_{jj} = \frac{1}{2} E[ (g_j^M - \bar{g}_j)^2 + (g_j^P - \bar{g}_j)^2 ] \quad (4)$$

and

$$C_{jj} = E[ (g_j^M - \bar{g}_j) \cdot (g_j^P - \bar{g}_j) ], \quad (5)$$

where  $\bar{g}_j$  is the mean allelic effect on the phenotype at locus  $j$  and  $g_j^M$  (respectively  $g_j^P$ ) is the allelic effect at locus  $j$  inherited from the maternal (respectively paternal) gamete. The sum of all values of  $C_{jj}$  represents the variance of allelic effects (the genic variance  $V_{\text{genic}}$ , the genetic variance of a trait in a population harboring the same allelic frequencies as the population under study, but without any genetic association between loci) and is computed from simulation outputs following equation (4). The sum of all values of  $C_{jj}$  represents the covariance in allelic effects on the maternally and paternally inherited chromosomes at locus  $j$ , and represents the fraction of the genetic variance due to excess of homozygosity (named  $V_{\text{inbred}}$ ); we compute it following equation (5). This quantity represents  $F \cdot V_{\text{genic}}$ , where  $F$  is the inbreeding coefficient of the population. These first term of equation (3) ( $2 \sum_j^L (C_{jj} + C_{j,j})$ ) represents the genetic variance due to within locus variation. The second term ( $2 \sum_{j \neq k}^L (C_{jk} + C_{j,k})$ ) represents the component of the variance due to associations between loci (noted  $V_{\text{LD}}$ ), and is obtained by subtracting  $V_{\text{genic}}$  and  $V_{\text{inbred}}$  from the total additive genetic variance. This component is proportional to linkage disequilibrium (LD), and tends to be negative under stabilizing selection due to associations between alleles from different loci with compensatory

effects (*i.e.* the allele on one locus is positive, the other negative, their effects on the phenotype thus cancel out when both are present).

### *Analyses after the environmental change*

Due to an increased probability of extinction during long periods of maladaptation, it seems more relevant to focus only on the dynamics of adaptation during the first generations after an environmental change. We follow the temporal dynamics of the additive variance and its components, the dynamic of the mean population phenotype, and the dynamic of the mean population fitness, as a function of the mating system and the mutation rate, over 20 generations.

In addition, and in order to test if remobilization of  $V_{LD}$  plays a role in the adaptation of selfing populations, we computed the slope of the trait mean dynamics just after the environmental change (during the first five generations) as a function of the amount of additive variance available at M-S-D equilibrium. If remobilization of  $V_{LD}$  is involved in the adaptive process of selfing populations, the initial slope, for a similar amount of additive variance, should be higher in selfing populations compared to mixed mating and outcrossing ones.

## **RESULTS**

Below we present results only for  $N = 250$  and  $L = 50$ , as larger population sizes and more loci did not qualitatively change the results. Results for  $N = 1000$ , as well as  $L = 500$  are given in the supplementary materials section (Figures S1-S6).

## DECOMPOSITION OF THE GENETIC VARIANCE AT EQUILIBRIUM

As predicted, the additive genetic variance present at M-S-D equilibrium in our simulations is negatively correlated with the selfing rate (figure 1A, see Abu Awad and Roze 2018 for the analytical model). By examining each component of the additive variance, we can see that the variance due to within loci variation ( $V_{\text{genic}} + V_F$ ) is higher in selfing populations due to the higher rate of homozygosity (figure 1 B & C). These two components, as well as the total additive variance, increase linearly with increasing mutation rates (figure 1 A, B & C). The among-loci component ( $V_{LD}$ ) is negative (figure 1D), due to the build-up of linkage disequilibrium between alleles with different signs, allowing phenotypes to be close to the phenotypic optimum (0). Because recombination is less effective under selfing, this negative component is responsible for the smaller additive variance observed under predominant selfing. It also contributes significantly to the variance observed in mixed mating and outcrossing populations with moderate to high mutation rates (figure 1D). Larger population sizes or more loci do not change the results for outcrossing and mixed mating populations (Figures S1-S2). For selfing populations, larger population sizes and higher per locus mutation rates contribute to increasing negative linkage disequilibrium ( $V_{LD}$ ) due to negative linkage disequilibrium (Figure S3).

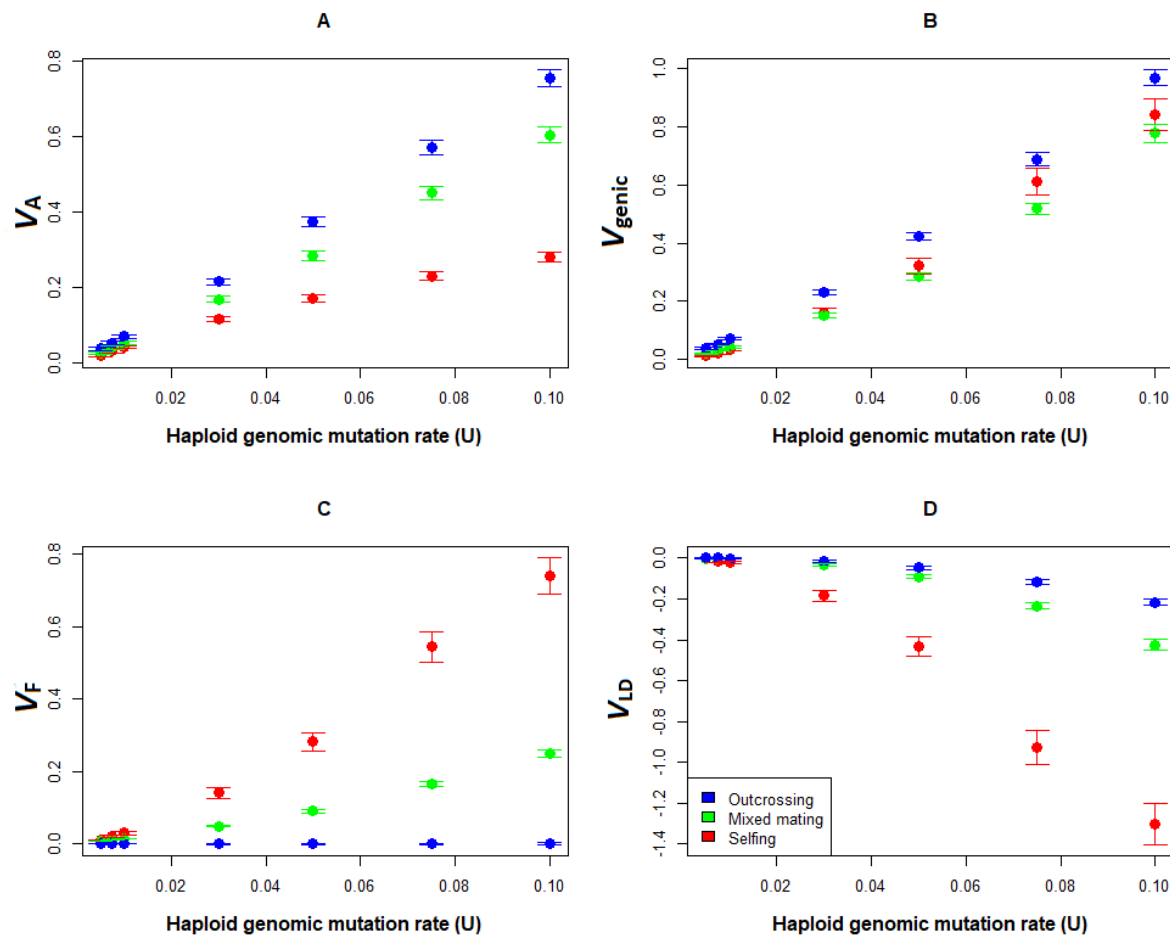

**Figure 1.** Additive genetic variance and its components as a function of the genomic mutation rate and the mating system. **A.** Observed additive variance for the phenotypic trait. **B.** Genic variance for the phenotypic trait ( $V_{genic}$ ). **C.** Genetic variance due to inbreeding ( $V_F$ ). **D.** Genetic variance due to linkage disequilibrium ( $V_{LD}$ ). Error bars stand for 95% confidence interval ( $n = 100$ ).

# ADAPTATION THROUGH STANDING GENETIC VARIATION:

For simplicity, we focus on four mutation rates ( $U = 0.005; 0.03; 0.05; 0.1$ ), representing the different patterns of genetic variance observed at M-S-D equilibrium for the

outcrossing, mixed mating and selfing populations mentioned above. We first describe the dynamics observed for outcrossing populations, which will serve as a reference for comparison with the dynamics of selfing populations. We generally find that the dynamics for mixed mating populations are similar to those of outcrossing populations (Figure S4).

## **DYNAMICS OF THE ADDITIVE VARIANCE AND OF ITS COMPONENTS:**

In outcrossing populations, the additive variance exhibits very tiny changes during the adaptation process, so do its components (Figure 2). In all cases, the observed additive genetic variance slightly increases during the first generations of adaptation (Figure 2A), then, it either reaches an equilibrium (Figure 2A,  $U < 0.1$ ) or slowly begins to decrease (Figure 2A,  $U = 0.1$ ). When  $V_{LD}$  is small at M-S-D equilibrium ( $U < 0.1$ ), the observed increase of the additive variance is mainly due to an increase of the genic variance (Figure 2B), probably due to successive sweeps of rare alleles during the adaptation process. In these situations,  $V_{LD}$  slightly decreases with time (Figure 2C), indicating that some associations between loci are building up. When  $V_{LD}$  is significant at M-S-D equilibrium ( $U = 0.1$ ), the genic variance remains constant during the first generations (Figure 2B), but  $V_{LD}$  increases slightly (Figure 2C), contributing to the increase of the additive variance. The second phase during which the observed additive variance decreases can be explained by the decrease of genic variance with time, due to the purging of deleterious mutations (Figure 2B).

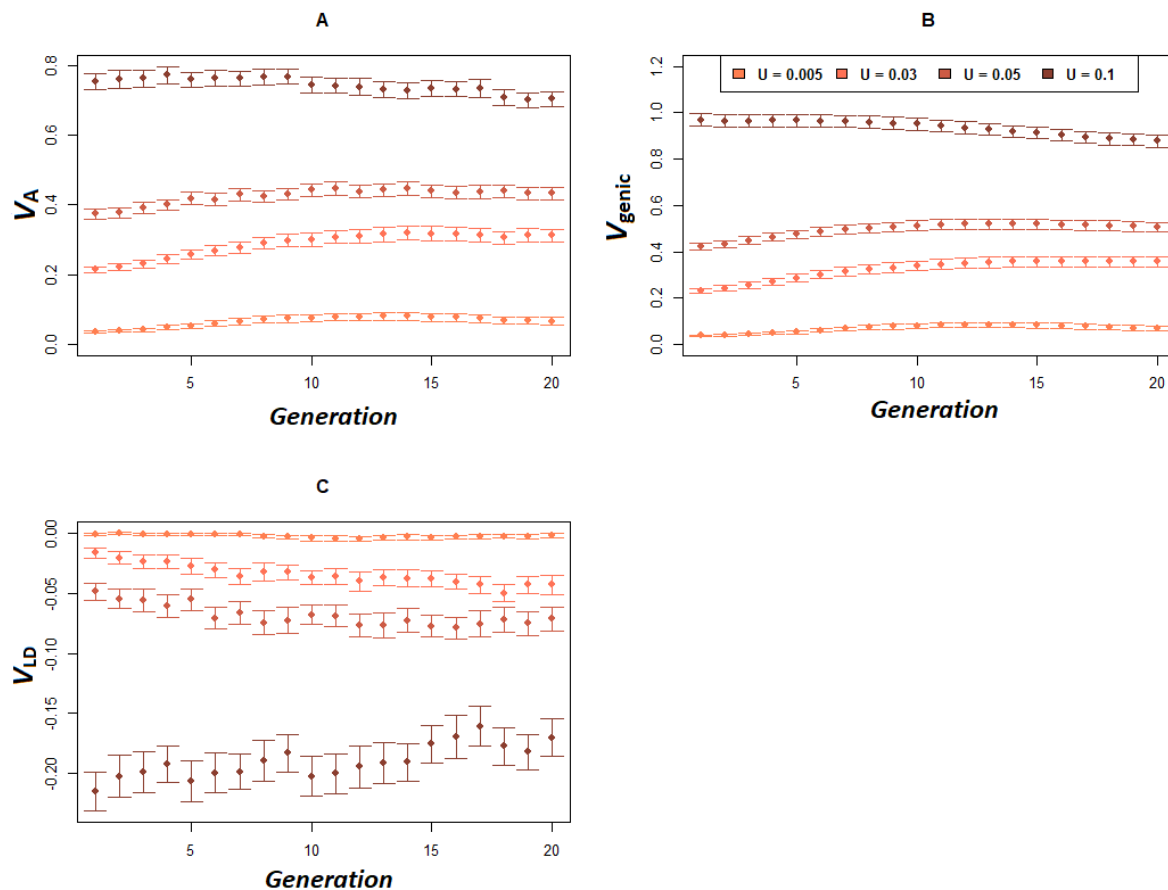

**Figure 2.** Dynamics of additive genetic variance and its components in function of the haplotypic trait mutation rate, for outcrossing populations. **A.** Observed additive variance for the phenotypic trait. **B.** Genic variance for the phenotypic trait ( $V_{genic}$ ). **C.** Genetic variance of the phenotype due to linkage disequilibrium ( $V_{LD}$ ). Error bars stand for 95% confidence interval ( $n=100$ ).

Contrary to the dynamics observed in outcrossing populations, additive variance substantially varies during the adaptation process in selfing populations. For small mutation rates ( $U \leq 0.03$ ), the dynamics are very similar to those observed in outcrossing populations (figure 3). The observed additive variance slightly increases during the first generations (Figure 3A). This increase is due to a rise of the genic variance (Figure 3B), associated with a

decrease of  $V_{LD}$  (Figure 3C), probably due to an interaction between sweeps of beneficial mutations that were rare before the environmental change and the creation of new beneficial associations between loci. For higher mutation rates ( $U \geq 0.05$ ), the dynamics are different. The genic variance remains constant during the first generations and then decreases (figure 3B), whereas  $V_{LD}$  increases faster than the decrease of  $V_{genic}$  (figure 3C), explaining the overall increase of additive variance. This behaviour can be explained as follows: there is a complex interaction between the purging of deleterious mutations due to selfing, which tends to quickly fix the best multi-locus genotypes, eroding genetic diversity and residual allogamy, which allows the mobilization of a small fraction of the hidden genetic diversity. The outcome of this interaction is an increase of the genetic diversity and of the populations' adaptive potential. The fact that the rate of adaptation (*i.e* the slope of the change in the trait values during the first generations) as a function of the initial level of additive variance is higher for selfing populations when  $V_{LD}$  is large, confirms that the remobilisation of the hidden diversity plays a role in the adaptation process (figure S5).



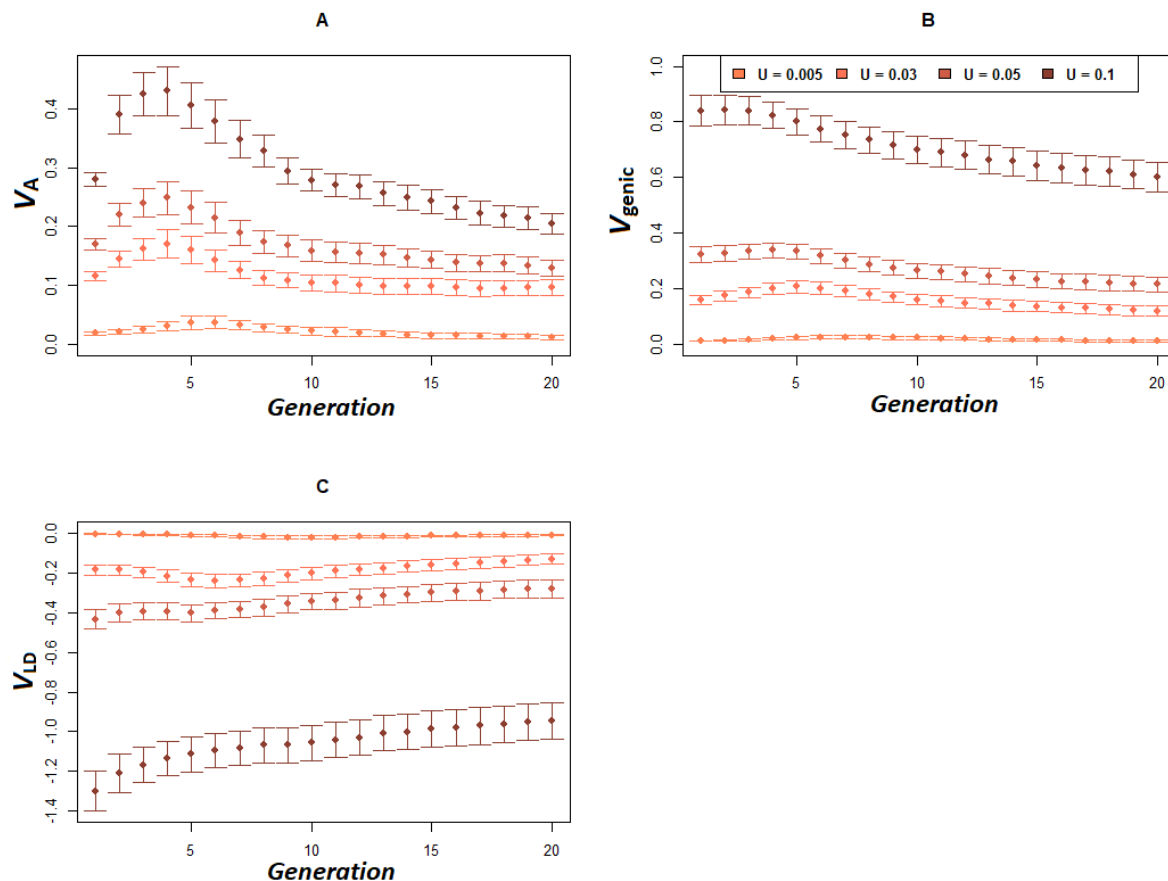

**Figure 3.** Dynamics of additive genetic variance and its components in function of the haplotypic trait mutation rate, for selfing populations. **A.** Observed additive variance for the phenotypic trait. **B.** Genic variance for the phenotypic trait ( $V_{genic}$ ). **C.** Genetic variance of the phenotype due to linkage disequilibrium ( $V_{LD}$ ). Error bars stand for 95% confidence interval (n=100).

### TRAIT AND FITNESS DYNAMICS DURING ADAPTATION PROCESS:

Here, we consider that there is adaptation if populations reach a similar level of fitness as that observed before the environmental change. In all cases, compared to selfing

populations, outcrossing and mixed mating population respond better to selection, by being closer to the new phenotypic optimum (figure 4). When the mutation rate is weak ( $U = 0.005$ ), none of the populations are able to adapt, and thus the fitness remains low (figure 4). For higher mutation rates ( $U > 0.005$ ), outcrossing and mixed mating populations are always close to the new optimum, and are able to return to fitness levels similar to those observed at M-S-D equilibrium. Selfing populations require that the mutation rate is high enough ( $U \geq 0.05$ , figure 4) in order to reach similar fitness levels as those observed in outcrossing populations. Interestingly, in some cases, adaptation occurs more rapidly in selfing populations, despite the higher genetic diversity of outcrossing populations. The larger the population size and the higher the per-locus mutation rate, the higher the level of potentially usable hidden genetic diversity, and the smaller the genomic mutation rate necessary to reach similar levels of fitness in selfing populations (figures S6-S7).

Nevertheless, different mating systems exhibit different dynamics of adaptation. Outcrossing populations adapt by reaching a new phenotypic optimum, but they also maintain a high level of genetic diversity (figure 3), resulting in populations having both mal-adapted and well-adapted individuals. Selfing populations are always further away from the new phenotypic optimum (figure 4), but both the remobilization of the  $V_{LD}$ , and the fast fixation of the “best” phenotypes allow for the production of close-to-optimum individuals. These phenotypes will then quickly increase in frequency, leading to more homogenous populations than observed for an outcrossing mating system (figure 4).

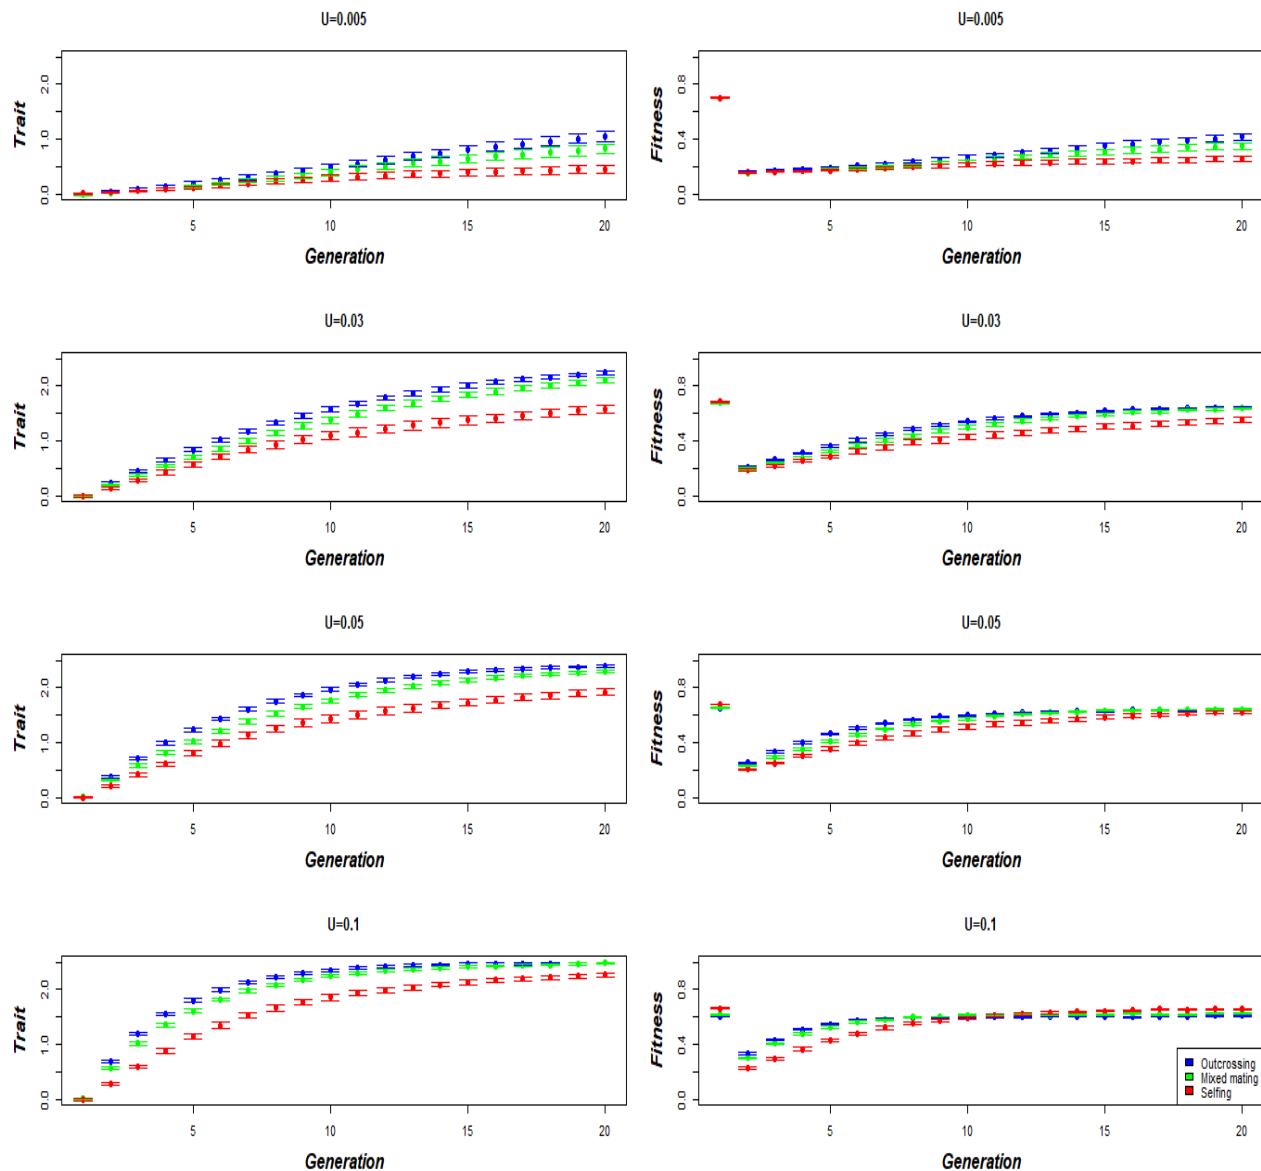

**Figure 4.** Dynamics of the trait and fitness, in function of the trait haplotypic mutation rate and the mating system. Error bars stand for 95% confidence interval (n=100).

## DISCUSSION

In accordance with Stebbins' definition of the dead-end hypothesis (Stebbins 1957), single-locus models predict that adaptation from standing genetic variation is less likely in

selfing populations compared to outcrossing ones, notably due to the reduced genetic variation resulting from purging (Glémin and Ronfort 2013). Considering a polygenic trait, and associated interactions among loci, we find that this is not always the case. Indeed, we find that for low mutation rates, our results support the expectations of single locus models. However, for higher mutation rates, and as predicted by previous work (Abu Awad and Roze 2018), associations between loci are no longer negligible. In this case, stabilizing selection shelters an important amount of hidden additive variance, especially in self-fertilising populations. We show that some of this variance can be released during phases of directional selection to new environmental conditions. Our results support that it is possible to observe similar levels of adaptation in selfing and outcrossing populations, despite unconditionally lower levels of observed additive variance under predominant selfing.

## **Hidden genetic variation, its remobilization and genotypic selection**

Stabilizing selection is expected to favour the build-up and maintenance of co-adapted gene complexes, and this will structure the additive variance into positive within-loci components and negative among-loci components, reducing the observed additive variance (Abu Awad and Roze 2018). In a changing environment, alleles involved in the negative among loci component of variance may be unveiled and mobilized to respond to directional selection (Le Rouzic and Carlborg 2008). Our analysis shows that such associations between loci, coupled with hidden genetic variation, are more likely to emerge in selfing than in outcrossing populations, because of less efficient recombination under selfing (Lande and Porcher 2015; Abu Awad and Roze 2018). This prediction is in accordance with empirical observations of more frequent transgressive segregation (progeny of a cross being outside the

phenotypic parental range) in inbred compared to outbred species (Rieseberg *et al.* 1999; Johansen-Morris and Latta 2006). Our analysis also shows that the less effective recombination rate associated with selfing avoids the complete release of the negative linkage disequilibria and thus limits the response to selection. As a result, selection mostly operates at the genotypic level while allelic selection is more prevalent in more recombining populations (Neher and Shraiman 2009). Interestingly, if the rate of self-fertilization is changed during the adaptation process ( $\sigma$  changing from 0.95 to zero after the environmental change), the dynamics of the fitness remains similar (figures S8-S9). Indeed, under complete outcrossing all the hidden genetic variance can be mobilized and this allows initially selfing populations to reach the new phenotypic optimum but recombination also generates less adapted genotypes which reduces the mean population fitness.

## ***De novo* mutations vs. standing genetic variation: rethinking adaptation in selfing species?**

It has been a long accepted paradigm that the advantage procured by selfing, was the rapid fixation of *de novo* mutations more efficiently than in outcrossing populations, independently of the dominance of new mutations, a process known as “Haldane sieve” (Haldane 1927). Indeed, from one locus theory, adaptation through new mutations is more likely in selfing species, and is more likely than adaptation from standing genetic variation (Glémin and Ronfort 2013). However, recent works have suggested that the reduced effective recombination rate of selfing populations adds a disadvantage even when it comes to the fixation of new mutations. Unlike what is expected in outcrossing populations, the fixation of beneficial mutations in selfing populations can be hindered if they appear during the selective

sweep triggered by a beneficial allele at another locus (Hartfield and Glémin 2016). This observation as well as the results presented here show that predictions from the point of view of polygenic models are less dichotomist: the ability of selfing populations to adapt from either *de novo* mutations or standing variation strongly depends on the parameters considered (the mutation rate in particular), with selfers being often as able to adapt as outcrossers, even if the underlying mechanisms strongly differ.

We have only considered a simple architecture of quantitative traits in which epistatic interactions emerge naturally. Epistasis, and notably its directionality, is known to play a key role in adaptation (Hansen 2013). Positive epistasis, with genes that reinforce each other's effects in the direction of selection, inflate the additive variance and thus the ability of populations to adapt to an environmental change (Carter *et al.* 2005; Monnahan and Kelly 2015), contrary to the non-directional epistatic scenario (Carter *et al.* 2005). Negative epistasis, where genes tend to mute each other's effects, reduces the additive variance of the character, thus limiting adaptive potential (Carter *et al.* 2005). Few empirical estimations of the directionality of epistasis are available in literature (Le Rouzic 2014; Monnahan and Kelly 2015; Oakley *et al.* 2015, all detecting positive epistatic interactions), despite numerous methods and the diversity of data used to infer it (Le Rouzic 2014). Developing methods to detect and measure the directionality of epistatic interactions in relation to the mating system may bring us closer to understanding the differences in patterns of adaptation observed in selfing and outcrossing populations.

**New insights into the role of standing genetic variation in the adaptation dynamics of selfing populations**

The overwhelming success of selfing species in the domestication process and as invasive species is not considered as resulting from a higher adaptive ability of selfing species compared to outcrossing ones. For instance, the invasive success of selfing populations is attributed to reproductive assurance, since a single individual is able to colonize a new environment (Rambuda and Johnson 2004; van Kleunen *et al.* 2008), and to reduce gene flow which are expected to limit maladapted gene exchanges between populations (Levin 2010). Regarding domestication, it has been argued that selection in selfing populations is most probably due to new mutations, because the standing genetic variation is lower in such populations due to more efficient purging of deleterious mutations that could be involved in the domestication process (Glémin and Bataillon 2009). This idea is reinforced by the fact that selfing species are expected to quickly fix a rare beneficial mutation, independently from its dominance level (Ross-Ibarra 2005). In their review on mating system variation in domesticated plant species, Glémin and Bataillon (2009) have suggested that the high frequency of self-fertilising crop species could be related to an increase in additive variance during domestication; this idea has however never been tested theoretically or empirically. Here we show that this increase in additive variance could indeed be an advantage when selfing species are faced with new environments. However, our results hold true only if bottlenecks during the domestication and invasion processes are not too strong or if mutation rates are high.

## CONCLUSION AND PERSPECTIVES

In this work, we argue that selfing populations under stabilizing selection are able to accumulate hidden genetic variation through negative linkage disequilibrium. Thanks to this

hidden variation, adaptation under high self-fertilisation rates is not always limited by the expected reduction in additive genetic variance due to purging. We therefore suggest that a simple estimation of additive variance of quantitative traits is not adequate when speculating on the long-term adaptive capacity of a population. Complementary analyses should also be carried out when quantifying the long-term evolvability of a population. Such analyses include looking for transgressive segregation, or carrying out experimental evolutionary experiments in which directional selection is induced. More empirical evidence is required to determine how frequent is cryptic diversity in natural populations of selfing species, and whether or not this property is sufficient to allow for selfing species to adapt to a changing environment.

**Acknowledgment:** We would like to thank D. Roze for helpful discussions about the analyses and interpretations of the results, and E. Noël, P. David, O. Ronce, S. Glémin and C. Devaux for insightful discussions on the results. This work has been conducted with the help of the data and calculation center South Green of the CIRAD- UMR AGAP. This work was supported by project SEAD (ANR-13-ADAP-0011). D. Abu Awad was also funded by the TUM University Foundation Fellowship.

## **Bibliography:**

Abu Awad D., and D. Roze, 2018 Effects of partial selfing on the equilibrium genetic variance, mutation load, and inbreeding depression under stabilizing selection. *Evolution* 72: 751–769.



489 Anderson J. T., C.-R. LEE, C. A. Rushworth, R. I. Colautti, and T. MITCHELL-OLDS, 2013 Genetic  
490 trade-offs and conditional neutrality contribute to local adaptation. *Mol. Ecol.* 22: 699–708.

491 Badano J. L., and N. Katsanis, 2002 Human genetics and disease: Beyond Mendel: an evolving view  
492 of human genetic disease transmission. *Nat. Rev. Genet.* 3: 779.

493 Barrett R. D., and D. Schluter, 2008 Adaptation from standing genetic variation. *Trends Ecol. Evol.*  
494 23: 38–44.

495 Berger D., S. S. Bauerfeind, W. U. Blanckenhorn, and M. A. Schäfer, 2011 High temperatures reveal  
496 cryptic genetic variation in a polymorphic female sperm storage organ. *Evol. Int. J. Org. Evol.*  
497 65: 2830–2842.

498 Bürger R., G. P. Wagner, and F. Stettinger, 1989 HOW MUCH HERITABLE VARIATION CAN BE  
499 MAINTAINED IN FINITE POPULATIONS BY MUTATION–SELECTION BALANCE?  
500 *Evolution* 43: 1748–1766. <https://doi.org/10.1111/j.1558-5646.1989.tb02624.x>

501 Carter A. J., J. Hermisson, and T. F. Hansen, 2005 The role of epistatic gene interactions in the  
502 response to selection and the evolution of evolvability. *Theor. Popul. Biol.* 68: 179–196.

503 Charlesworth D., and B. Charlesworth, 1995 Quantitative genetics in plants: the effect of the breeding  
504 system on genetic variability. *Evolution* 49: 911–920.

505 Clo J., L. Gay, and J. Ronfort, 2019 How does selfing affect the genetic variance of quantitative traits?  
506 An updated meta-analysis on empirical results in angiosperm species. *Evolution*.

507 Geber M. A., and L. R. Griffen, 2003 Inheritance and natural selection on functional traits. *Int. J. Plant*  
508 *Sci.* 164: S21–S42.

509 Gibson G., and I. Dworkin, 2004 Uncovering cryptic genetic variation. *Nat. Rev. Genet.* 5: 681.

510 Glémin S., and T. Bataillon, 2009 A comparative view of the evolution of grasses under  
511 domestication. *New Phytol.* 183: 273–290. <https://doi.org/10.1111/j.1469-8137.2009.02884.x>

512 Glémin S., and J. Ronfort, 2013 Adaptation and maladaptation in selfing and outcrossing species: new  
513 mutations versus standing variation. *Evol. Int. J. Org. Evol.* 67: 225–240.

514 Haag-Liautard C., M. Dorris, X. Maside, S. Macaskill, D. L. Halligan, *et al.*, 2007 Direct estimation of  
515 per nucleotide and genomic deleterious mutation rates in *Drosophila*. *Nature* 445: 82.

516 Haldane J. B. S., 1927 A mathematical theory of Natural and Artificial Selection. *Math. Proc. Camb.*  
517 *Philos. Soc.* 23: 607–615. <https://doi.org/10.1017/S0305004100011750>

518 Hansen T. F., 2013 WHY EPISTASIS IS IMPORTANT FOR SELECTION AND ADAPTATION.  
519 *Evolution* 67: 3501–3511. <https://doi.org/10.1111/evo.12214>

520 Hartfield M., and S. Glémin, 2016 Limits to Adaptation in Partially Selfing Species. *Genetics* 203:  
521 959. <https://doi.org/10.1534/genetics.116.188821>

522 Hermisson J., and P. S. Pennings, 2005 Soft sweeps: molecular population genetics of adaptation from  
523 standing genetic variation. *Genetics* 169: 2335–2352.

524 Igic B., and J. W. Busch, 2013 Is self-fertilization an evolutionary dead end? *New Phytol.* 198: 386–  
525 397.

526 Innan H., and Y. Kim, 2004 Pattern of polymorphism after strong artificial selection in a  
527 domestication event. *Proc. Natl. Acad. Sci.* 101: 10667–10672.

528 Johansen-Morris A. D., and R. G. Latta, 2006 Fitness consequences of hybridization between ecotypes  
529 of *Avena barbata*: hybrid breakdown, hybrid vigor, and transgressive segregation. *Evolution*  
530 60: 1585–1595.

531 Keightley P. D., and T. M. Bataillon, 2000 Multigeneration Maximum-Likelihood Analysis Applied to  
532 Mutation-Accumulation Experiments in *Caenorhabditis elegans*. *Genetics* 154:  
533 1193.

534 Kim S.-Y., J. C. Noguera, A. Tato, and A. Velando, 2013 Vitamins, stress and growth: the availability  
535 of antioxidants in early life influences the expression of cryptic genetic variation. *J. Evol.*  
536 *Biol.* 26: 1341–1352.

537 Kleunen M. van, J. C. Manning, V. Pasqualetto, and S. D. Johnson, 2008 Phylogenetically  
538 Independent Associations between Autonomous Self-Fertilization and Plant Invasiveness.  
539 *Am. Nat.* 171: 195–201. <https://doi.org/10.1086/525057>

540 Lande R., and E. Porcher, 2015 Maintenance of quantitative genetic variance under partial self-  
541 fertilization, with implications for evolution of selfing. *Genetics* 200: 891–906.

542 Le Rouzic A., and Ö. Carlborg, 2008 Evolutionary potential of hidden genetic variation. *Trends Ecol.*  
543 *Evol.* 23: 33–37.

544 Le Rouzic A., 2014 Estimating directional epistasis. *Front. Genet.* 5: 198.  
545 <https://doi.org/10.3389/fgene.2014.00198>

546 Ledon-Rettig C. C., D. W. Pfennig, and E. J. Crespi, 2010 Diet and hormonal manipulation reveal  
547 cryptic genetic variation: implications for the evolution of novel feeding strategies. *Proc. R.*  
548 *Soc. B Biol. Sci.* 277: 3569–3578.

549 Levin D. A., 2010 Environment-enhanced self-fertilization: implications for niche shifts in adjacent  
550 populations. *J. Ecol.* 98: 1276–1283. <https://doi.org/10.1111/j.1365-2745.2010.01715.x>

551 Manna F., G. Martin, and T. Lenormand, 2011 Fitness Landscapes: An Alternative Theory for the  
552 Dominance of Mutation. *Genetics* 189: 923. <https://doi.org/10.1534/genetics.111.132944>

553 Martin G., and T. Lenormand, 2006 A GENERAL MULTIVARIATE EXTENSION OF FISHER'S  
554 GEOMETRICAL MODEL AND THE DISTRIBUTION OF MUTATION FITNESS  
555 EFFECTS ACROSS SPECIES. *Evolution* 60: 893–907. [https://doi.org/10.1111/j.0014-](https://doi.org/10.1111/j.0014-3820.2006.tb01169.x)  
556 [3820.2006.tb01169.x](https://doi.org/10.1111/j.0014-3820.2006.tb01169.x)

557 Martin G., S. F. Elena, and T. Lenormand, 2007 Distributions of epistasis in microbes fit predictions  
558 from a fitness landscape model. *Nat. Genet.* 39: 555–560. <https://doi.org/10.1038/ng1998>

559 Matuszewski S., J. Hermisson, and M. Kopp, 2015 Catch me if you can: adaptation from standing  
560 genetic variation to a moving phenotypic optimum. *Genetics* 200: 1255–1274.

561 McGuigan K., N. Nishimura, M. Currey, D. Hurwit, and W. A. Cresko, 2011 Cryptic genetic variation  
562 and body size evolution in threespine stickleback. *Evol. Int. J. Org. Evol.* 65: 1203–1211.

563 Milloz J., F. Duveau, I. Nuez, and M.-A. Félix, 2008 Intraspecific evolution of the intercellular  
564 signaling network underlying a robust developmental system. *Genes Dev.* 22: 3064–3075.

565 Mittell E. A., S. Nakagawa, and J. D. Hadfield, 2015 Are molecular markers useful predictors of  
566 adaptive potential? *Ecol. Lett.* 18: 772–778.

567 Monnahan P. J., and J. K. Kelly, 2015 Epistasis is a major determinant of the additive genetic variance  
568 in *Mimulus guttatus*. *PLoS Genet.* 11: e1005201.

569 Neher R. A., and B. I. Shraiman, 2009 Competition between recombination and epistasis can cause a  
570 transition from allele to genotype selection. *Proc. Natl. Acad. Sci.* 106: 6866.  
571 <https://doi.org/10.1073/pnas.0812560106>

572 Nordborg M., 2000 Linkage disequilibrium, gene trees and selfing: an ancestral recombination graph  
573 with partial self-fertilization. *Genetics* 154: 923–929.

574 Oakley C. G., J. Ågren, and D. W. Schemske, 2015 Heterosis and outbreeding depression in crosses  
575 between natural populations of *Arabidopsis thaliana*. *Heredity* 115: 73.

576 Orr H. A., and A. J. Betancourt, 2001 Haldane’s sieve and adaptation from the standing genetic  
577 variation. *Genetics* 157: 875–884.

578 Paaby A. B., and M. V. Rockman, 2014 Cryptic genetic variation: evolution’s hidden substrate. *Nat.*  
579 *Rev. Genet.* 15: 247.

580 Pritchard J. K., J. K. Pickrell, and G. Coop, 2010 The genetics of human adaptation: hard sweeps, soft  
581 sweeps, and polygenic adaptation. *Curr. Biol.* 20: R208–R215.

582 Queitsch C., T. A. Sangster, and S. Lindquist, 2002 Hsp90 as a capacitor of phenotypic variation.  
583 *Nature* 417: 618.

584 Rambuda T. D., and S. D. Johnson, 2004 Breeding systems of invasive alien plants in South Africa:  
585 does Baker’s rule apply? *Divers. Distrib.* 10: 409–416. [https://doi.org/10.1111/j.1366-](https://doi.org/10.1111/j.1366-9516.2004.00100.x)  
586 [9516.2004.00100.x](https://doi.org/10.1111/j.1366-9516.2004.00100.x)

587 Rieseberg L. H., M. A. Archer, and R. K. Wayne, 1999 Transgressive segregation, adaptation and  
588 speciation. *Heredity* 83: 363–372.

589 Rohner N., D. F. Jarosz, J. E. Kowalko, M. Yoshizawa, W. R. Jeffery, *et al.*, 2013 Cryptic variation in  
590 morphological evolution: HSP90 as a capacitor for loss of eyes in cavefish. *Science* 342:  
591 1372–1375.

592 Ronce O., F. H. Shaw, F. Rousset, and R. G. Shaw, 2009 IS INBREEDING DEPRESSION LOWER  
593 IN MALADAPTED POPULATIONS? A QUANTITATIVE GENETICS MODEL. *Evolution*  
594 63: 1807–1819. <https://doi.org/10.1111/j.1558-5646.2009.00678.x>

595 Ross-Ibarra J., 2005 Quantitative trait loci and the study of plant domestication, pp. 197–204 in  
596 *Genetics of Adaptation*, edited by Mauricio R. Springer Netherlands, Dordrecht.

597 Shao H., L. C. Burrage, D. S. Sinasac, A. E. Hill, S. R. Ernest, *et al.*, 2008 Genetic architecture of  
598 complex traits: large phenotypic effects and pervasive epistasis. *Proc. Natl. Acad. Sci.* 105:  
599 19910–19914.

600 Shaw F. H., C. J. Geyer, and R. G. Shaw, 2002 A COMPREHENSIVE MODEL OF MUTATIONS  
601 AFFECTING FITNESS AND INFERENCES FOR ARABIDOPSIS THALIANA. *Evolution*  
602 56: 453–463. <https://doi.org/10.1111/j.0014-3820.2002.tb01358.x>

603 Stebbins G. L., 1957 Self fertilization and population variability in the higher plants. *Am. Nat.* 91:  
604 337–354.

605 Takebayashi N., and P. L. Morrell, 2001 Is self-fertilization an evolutionary dead end? Revisiting an  
606 old hypothesis with genetic theories and a macroevolutionary approach. *Am. J. Bot.* 88: 1143–  
607 1150.

608 Turelli M., and N. H. Barton, 1990 Dynamics of polygenic characters under selection. *Theor. Popul.*  
609 *Biol.* 38: 1–57. [https://doi.org/10.1016/0040-5809\(90\)90002-D](https://doi.org/10.1016/0040-5809(90)90002-D)

610 Waddington C. H., 1953 Genetic assimilation of an acquired character. *Evolution* 7: 118–126.

611 Wood J. L., M. C. Yates, and D. J. Fraser, 2016 Are heritability and selection related to population  
612 size in nature? Meta-analysis and conservation implications. *Evol. Appl.* 9: 640–657.

613
